# Supplementary material
Source: PubMed Central journal article supplement (PMC6454842)
Supplement: kwy283_obrien_web_material.pdf [file kwy283_obrien_web_material.pdf]

**Web Table 1. Correlations between metals in controls.**

|           | <b>As</b> | <b>Cd</b> | <b>Co</b> | <b>Cr</b> | <b>Cu</b> | <b>Hg</b> | <b>Mo</b> | <b>Pb</b> | <b>Sn</b> | <b>V</b> |
|-----------|-----------|-----------|-----------|-----------|-----------|-----------|-----------|-----------|-----------|----------|
| <b>As</b> | 1.00      | 0.23      | 0.29      | 0.21      | 0.14      | 0.12      | 0.23      | 0.30      | 0.13      | 0.35     |
| <b>Cd</b> | <.0001    | 1.00      | 0.42      | 0.23      | 0.20      | 0.05      | 0.11      | 0.53      | 0.26      | 0.23     |
| <b>Co</b> | <.0001    | <.0001    | 1.00      | 0.33      | 0.21      | 0.02      | 0.25      | 0.39      | 0.25      | 0.48     |
| <b>Cr</b> | <.0001    | <.0001    | <.0001    | 1.00      | 0.10      | 0.12      | 0.23      | 0.32      | 0.19      | 0.28     |
| <b>Cu</b> | <.0001    | <.0001    | <.0001    | 0.0003    | 1.00      | 0.13      | 0.06      | 0.17      | 0.12      | 0.13     |
| <b>Hg</b> | <.0001    | 0.11      | 0.38      | <.0001    | <.0001    | 1.00      | -0.01     | 0.05      | 0.07      | 0.06     |
| <b>Mo</b> | <.0001    | 0.0002    | <.0001    | <.0001    | 0.03      | 0.79      | 1.00      | 0.26      | 0.28      | 0.40     |
| <b>Pb</b> | <.0001    | <.0001    | <.0001    | <.0001    | <.0001    | 0.07      | <.0001    | 1.00      | 0.29      | 0.29     |
| <b>Sn</b> | <.0001    | <.0001    | <.0001    | <.0001    | <.0001    | 0.02      | <.0001    | <.0001    | 1.00      | 0.29     |
| <b>V</b>  | <.0001    | <.0001    | <.0001    | <.0001    | <.0001    | 0.02      | <.0001    | <.0001    | <.0001    | 1.00     |

**Web Table 2. Odds ratios (OR) and 95% confidence intervals (CI) for the association between each metal and young-onset breast cancer, with and without time-corrections.**

|                   |            | <b>OR (95% CI)<br/>for observed<br/>metal levels<br/>(n=1217<br/>sister pairs)</b> | <b>OR (95% CI) for<br/>time-corrected<br/>metal level<br/>(n=1217 sister<br/>pairs)</b> | <b>OR (95% CI) for<br/>time-corrected<br/>metal level, ER+<br/>breast cancer (961<br/>sister pairs)</b> | <b>OR (95% CI) for<br/>time-corrected metal<br/>level, invasive breast<br/>cancer (1044 sister<br/>pairs)</b> |
|-------------------|------------|------------------------------------------------------------------------------------|-----------------------------------------------------------------------------------------|---------------------------------------------------------------------------------------------------------|---------------------------------------------------------------------------------------------------------------|
| <b>Arsenic</b>    | Quartile 1 | 1.00                                                                               | 1.00                                                                                    | 1.00                                                                                                    | 1.00                                                                                                          |
|                   | Quartile 2 | 0.75 (0.59, 0.95)                                                                  | 0.79 (0.60, 1.05)                                                                       | 0.78 (0.57, 1.07)                                                                                       | 0.86 (0.64, 1.15)                                                                                             |
|                   | Quartile 3 | 0.93 (0.74, 1.18)                                                                  | 1.13 (0.80, 1.60)                                                                       | 1.08 (0.76, 1.54)                                                                                       | 1.21 (0.83, 1.77)                                                                                             |
|                   | Quartile 4 | 0.80 (0.64, 1.02)                                                                  | 1.07 (0.72, 1.57)                                                                       | 1.05 (0.71, 1.55)                                                                                       | 1.13 (0.77, 1.66)                                                                                             |
|                   | P-trend    | 0.25                                                                               | 0.40                                                                                    | 0.47                                                                                                    | 0.29                                                                                                          |
| <b>Cadmium</b>    | Quartile 1 | 1.00                                                                               | 1.00                                                                                    | 1.00                                                                                                    | 1.00                                                                                                          |
|                   | Quartile 2 | 0.95 (0.76, 1.19)                                                                  | 1.26 (0.99, 1.61)                                                                       | 1.42 (1.08, 1.87)                                                                                       | 1.30 (1.00, 1.69)                                                                                             |
|                   | Quartile 3 | 0.74 (0.58, 0.94)                                                                  | 1.06 (0.80, 1.42)                                                                       | 1.08 (0.79, 1.47)                                                                                       | 1.05 (0.77, 1.42)                                                                                             |
|                   | Quartile 4 | 0.64 (0.50, 0.82)                                                                  | 1.15 (0.82, 1.60)                                                                       | 1.26 (0.88, 1.81)                                                                                       | 1.25 (0.88, 1.78)                                                                                             |
|                   | P-trend    | <0.001                                                                             | 0.67                                                                                    | 0.50                                                                                                    | 0.44                                                                                                          |
| <b>Cobalt</b>     | Quartile 1 | 1.00                                                                               | 1.00                                                                                    | 1.00                                                                                                    | 1.00                                                                                                          |
|                   | Quartile 2 | 0.92 (0.72, 1.17)                                                                  | 1.02 (0.74, 1.43)                                                                       | 0.99 (0.71, 1.38)                                                                                       | 1.14 (0.81, 1.60)                                                                                             |
|                   | Quartile 3 | 0.94 (0.74, 1.19)                                                                  | 1.08 (0.79, 1.49)                                                                       | 1.04 (0.75, 1.44)                                                                                       | 1.13 (0.80, 1.61)                                                                                             |
|                   | Quartile 4 | 0.93 (0.73, 1.18)                                                                  | 1.31 (0.82, 2.08)                                                                       | 1.24 (0.76, 2.02)                                                                                       | 1.41 (0.87, 2.27)                                                                                             |
|                   | P-trend    | 0.61                                                                               | 0.22                                                                                    | 0.34                                                                                                    | 0.17                                                                                                          |
| <b>Chromium</b>   | Quartile 1 | 1.00                                                                               | 1.00                                                                                    | 1.00                                                                                                    | 1.00                                                                                                          |
|                   | Quartile 2 | 0.76 (0.60, 0.96)                                                                  | 0.94 (0.70, 1.28)                                                                       | 0.94 (0.69, 1.28)                                                                                       | 0.88 (0.64, 1.22)                                                                                             |
|                   | Quartile 3 | 0.74 (0.59, 0.94)                                                                  | 1.00 (0.71, 1.41)                                                                       | 0.97 (0.66, 1.41)                                                                                       | 0.94 (0.65, 1.35)                                                                                             |
|                   | Quartile 4 | 0.76 (0.61, 0.96)                                                                  | 1.08 (0.69, 1.69)                                                                       | 0.93 (0.59, 1.45)                                                                                       | 1.02 (0.64, 1.63)                                                                                             |
|                   | P-trend    | 0.02                                                                               | 0.70                                                                                    | 0.78                                                                                                    | 0.87                                                                                                          |
| <b>Copper</b>     | Quartile 1 | 1.00                                                                               | 1.00                                                                                    | 1.00                                                                                                    | 1.00                                                                                                          |
|                   | Quartile 2 | 0.84 (0.66, 1.06)                                                                  | 0.84 (0.63, 1.11)                                                                       | 0.72 (0.52, 1.00)                                                                                       | 0.86 (0.63, 1.18)                                                                                             |
|                   | Quartile 3 | 0.98 (0.77, 1.24)                                                                  | 0.97 (0.70, 1.36)                                                                       | 0.86 (0.60, 1.23)                                                                                       | 0.94 (0.67, 1.32)                                                                                             |
|                   | Quartile 4 | 1.09 (0.87, 1.38)                                                                  | 1.09 (0.73, 1.62)                                                                       | 0.93 (0.62, 1.40)                                                                                       | 1.11 (0.72, 1.70)                                                                                             |
|                   | P-trend    | 0.26                                                                               | 0.52                                                                                    | 0.99                                                                                                    | 0.56                                                                                                          |
| <b>Mercury</b>    | Quartile 1 | 1.00                                                                               | 1.00                                                                                    | 1.00                                                                                                    | 1.00                                                                                                          |
|                   | Quartile 2 | 0.89 (0.70, 1.12)                                                                  | 0.90 (0.71, 1.14)                                                                       | 0.95 (0.72, 1.24)                                                                                       | 0.99 (0.77, 1.28)                                                                                             |
|                   | Quartile 3 | 0.87 (0.69, 1.10)                                                                  | 0.90 (0.67, 1.21)                                                                       | 1.04 (0.74, 1.45)                                                                                       | 0.96 (0.70, 1.31)                                                                                             |
|                   | Quartile 4 | 0.87 (0.69, 1.10)                                                                  | 0.99 (0.68, 1.45)                                                                       | 1.01 (0.68, 1.50)                                                                                       | 1.05 (0.70, 1.57)                                                                                             |
|                   | P-trend    | 0.26                                                                               | 0.98                                                                                    | 0.86                                                                                                    | 0.88                                                                                                          |
| <b>Molybdenum</b> | Quartile 1 | 1.00                                                                               | 1.00                                                                                    | 1.00                                                                                                    | 1.00                                                                                                          |
|                   | Quartile 2 | 1.12 (0.88, 1.41)                                                                  | 1.22 (0.85, 1.75)                                                                       | 1.12 (0.77, 1.64)                                                                                       | 1.22 (0.83, 1.79)                                                                                             |
|                   | Quartile 3 | 1.10 (0.87, 1.40)                                                                  | 1.36 (0.90, 2.06)                                                                       | 1.25 (0.81, 1.92)                                                                                       | 1.35 (0.86, 2.12)                                                                                             |
|                   | Quartile 4 | 1.06 (0.83, 1.35)                                                                  | 1.33 (0.84, 2.12)                                                                       | 1.25 (0.77, 2.00)                                                                                       | 1.33 (0.81, 2.16)                                                                                             |
|                   | P-trend    | 0.75                                                                               | 0.20                                                                                    | 0.33                                                                                                    | 0.24                                                                                                          |
| <b>Lead</b>       | Quartile 1 | 1.00                                                                               | 1.00                                                                                    | 1.00                                                                                                    | 1.00                                                                                                          |
|                   | Quartile 2 | 0.68 (0.54, 0.85)                                                                  | 0.85 (0.65, 1.12)                                                                       | 0.80 (0.60, 1.06)                                                                                       | 0.91 (0.68, 1.23)                                                                                             |
|                   | Quartile 3 | 0.54 (0.42, 0.68)                                                                  | 0.85 (0.59, 1.21)                                                                       | 0.84 (0.59, 1.20)                                                                                       | 0.93 (0.63, 1.37)                                                                                             |
|                   | Quartile 4 | 0.67 (0.53, 0.84)                                                                  | 1.11 (0.76, 1.61)                                                                       | 1.14 (0.78, 1.68)                                                                                       | 1.13 (0.77, 1.68)                                                                                             |
|                   | P-trend    | <0.001                                                                             | 0.64                                                                                    | 0.48                                                                                                    | 0.56                                                                                                          |
| <b>Tin</b>        | Quartile 1 | 1.00                                                                               | 1.00                                                                                    | 1.00                                                                                                    | 1.00                                                                                                          |
|                   | Quartile 2 | 0.85 (0.67, 1.07)                                                                  | 0.92 (0.69, 1.21)                                                                       | 0.95 (0.70, 1.30)                                                                                       | 0.93 (0.70, 1.24)                                                                                             |
|                   | Quartile 3 | 0.93 (0.74, 1.18)                                                                  | 1.19 (0.84, 1.68)                                                                       | 1.16 (0.80, 1.67)                                                                                       | 1.33 (0.93, 1.90)                                                                                             |
|                   | Quartile 4 | 0.92 (0.73, 1.17)                                                                  | 1.22 (0.78, 1.90)                                                                       | 1.24 (0.79, 1.94)                                                                                       | 1.20 (0.76, 1.90)                                                                                             |
|                   | P-trend    | 0.70                                                                               | 0.23                                                                                    | 0.26                                                                                                    | 0.22                                                                                                          |
| <b>Vanadium</b>   | Quartile 1 | 1.00                                                                               | 1.00                                                                                    | 1.00                                                                                                    | 1.00                                                                                                          |
|                   | Quartile 2 | 1.07 (0.84, 1.35)                                                                  | 1.00 (0.76, 1.29)                                                                       | 1.06 (0.79, 1.43)                                                                                       | 1.05 (0.80, 1.40)                                                                                             |
|                   | Quartile 3 | 1.10 (0.87, 1.39)                                                                  | 1.21 (0.87, 1.66)                                                                       | 1.16 (0.84, 1.62)                                                                                       | 1.28 (0.92, 1.78)                                                                                             |
|                   | Quartile 4 | 1.12 (0.88, 1.42)                                                                  | 1.36 (0.84, 2.21)                                                                       | 1.31 (0.79, 2.19)                                                                                       | 1.39 (0.83, 2.33)                                                                                             |
|                   | P-trend    | 0.33                                                                               | 0.17                                                                                    | 0.28                                                                                                    | 0.17                                                                                                          |

All models adjusted for age and education.
